# Supplementary material
Source: PubMed Central journal article supplement (PMC2665019)
Supplement: mmc1.pdf [file mmc1.pdf]

**Supplemental Data**

**Estimating Odds Ratios in Genome Scans:**

**an Approximate Conditional Likelihood Approach**

Arpita Ghosh, Fei Zou, and Fred A. Wright

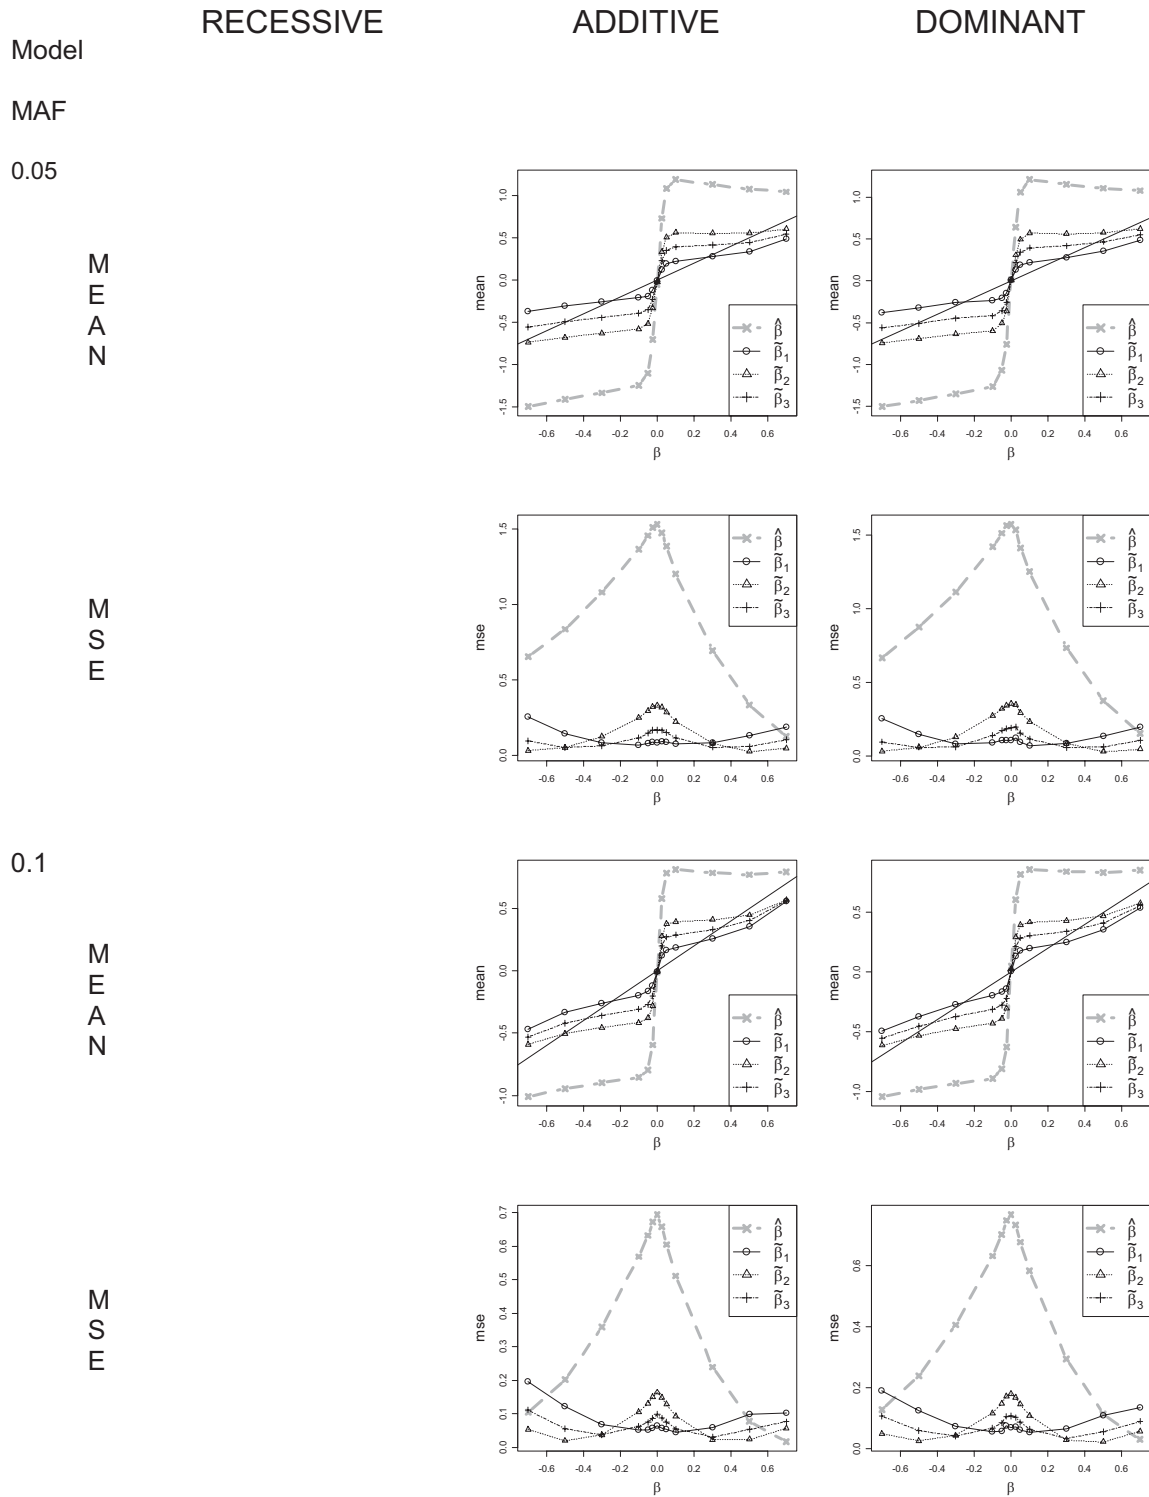

0.5

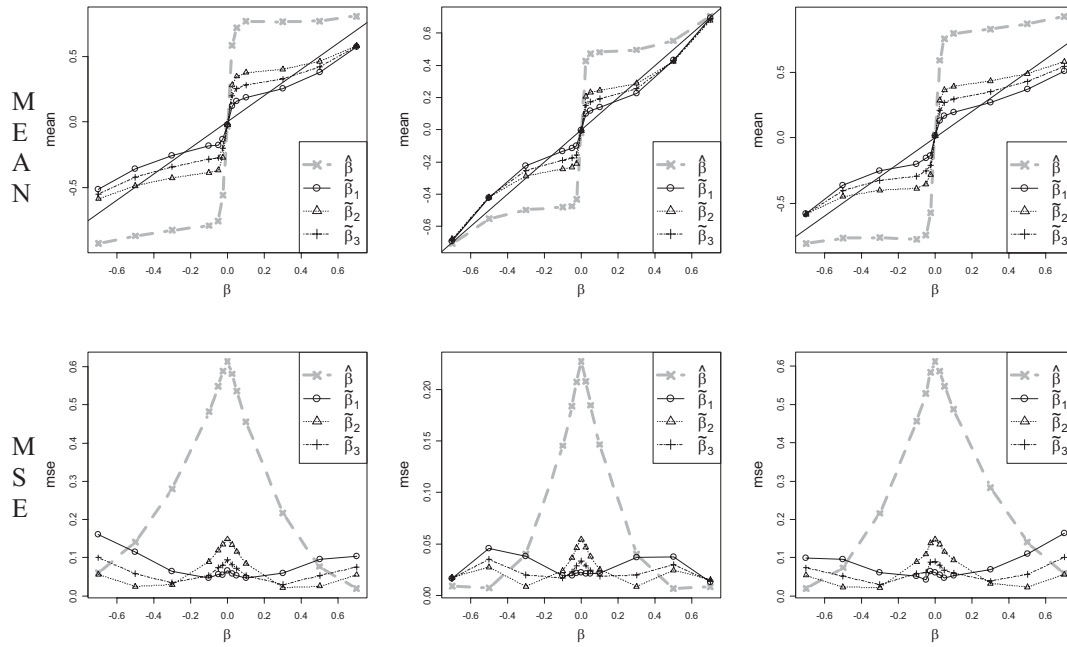

**Figure S1. Expected Values and Mean Square Errors for the Estimators for the Three Models**

MAF values are 0.05, 0.1 and 0.5 for additive and dominant models, and MAF = 0.5 for recessive models.

Model

RECESSIVE

ADDITIVE

DOMINANT

MAF

0.05

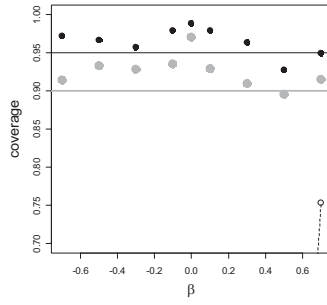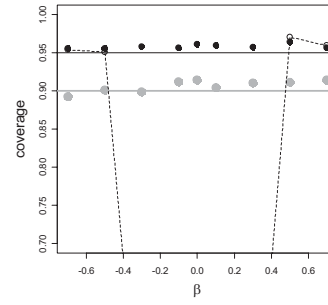

0.1

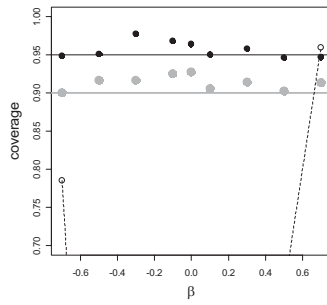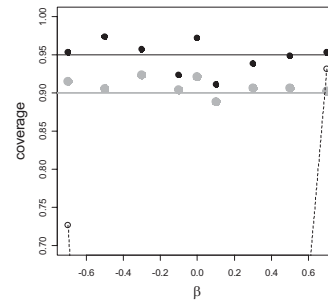

0.5

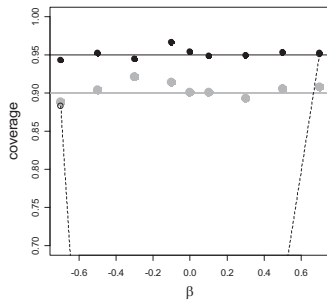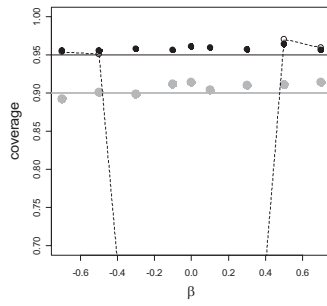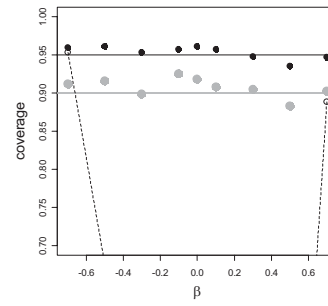

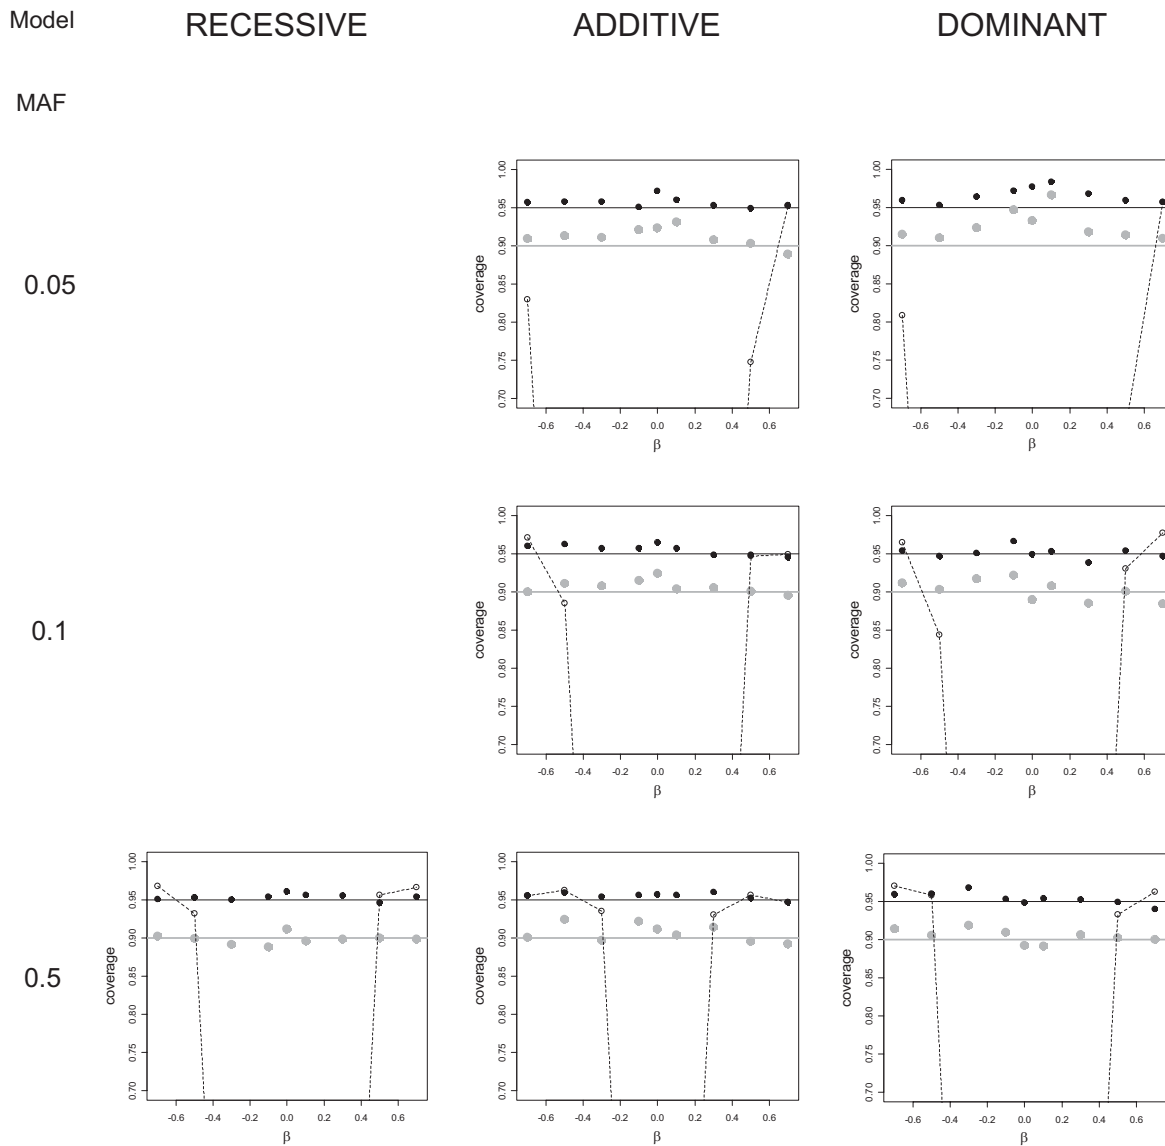

**Figure S2. Estimates of the CI Coverage Probability Plotted Against for the Three Models**

Various MAF values are shown (for recessive models, only MAF = 0.5 is depicted), as well as sample sizes of  $n = 1000$  and  $n = 2000$ . Black dots correspond to 95% CIs; gray dots correspond to 90% CIs. The dashed curves represent coverage of standard 95% CIs that do not acknowledge the significance selection.

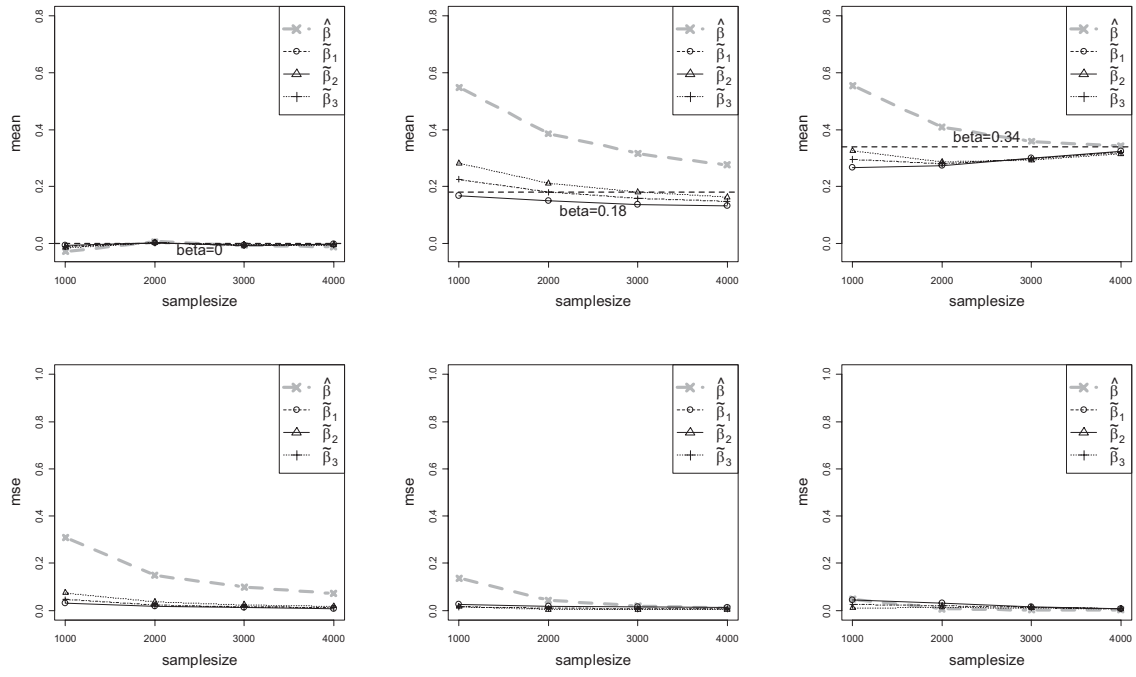

**Figure S3. Expected Values and Mean Square Errors of the Estimators for the Additive Model with MAF = 0.25**  
 The results are plotted against sample size, for  $\beta = 0, 0.18,$  and  $0.34,$  corresponding to OR values 1.0, 1.2, and 1.4.

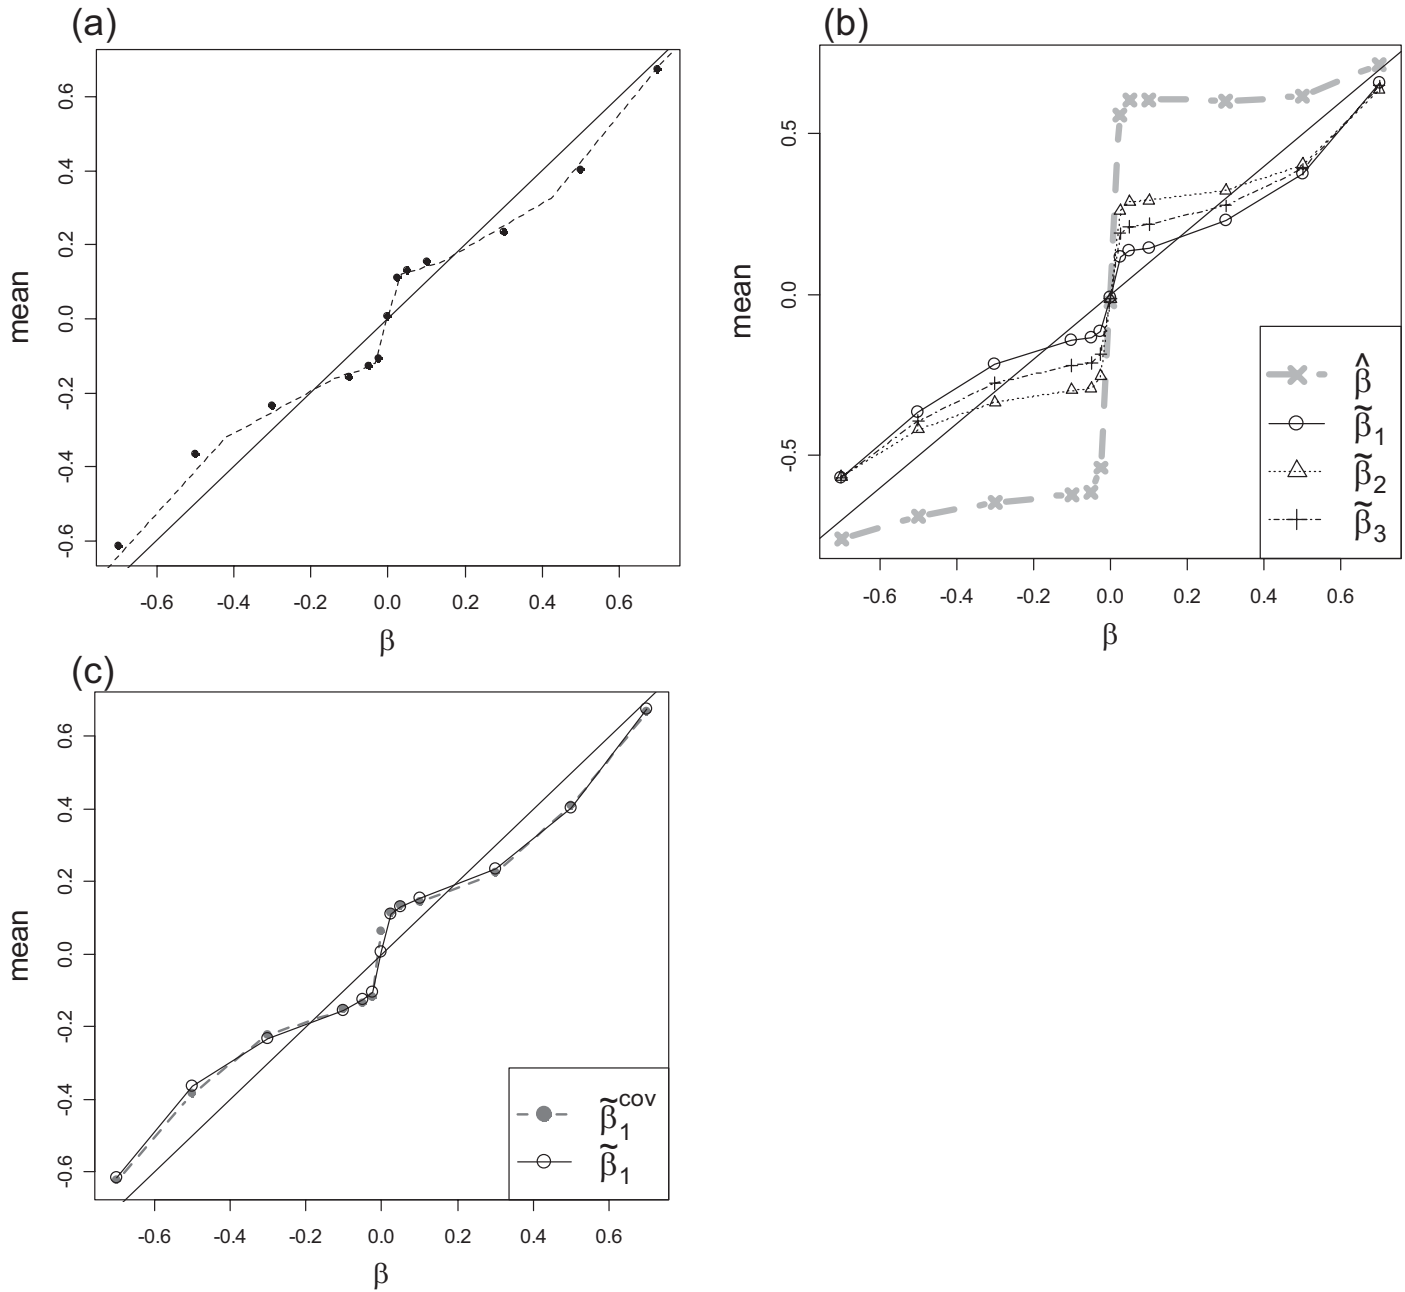

**Figure S4. Properties of the Corrected Estimators Extend to Additional Settings**

Throughout this figure we use the additive model, MAF = 0.25, and  $n = 1000$  except where noted. (a) Expectations of  $\hat{\beta}_1$  vs.  $\beta$  (plotted points) for  $n = 1000$ , overlaid with results for the same estimator versus  $\beta$  (dashed line) for  $n = 2000$ . The close correspondence is a consequence of the unifying treatment in terms of  $\beta$ . (b) Expectations of the estimators for  $c = 5.5$  show that the qualitative behavior is similar to the behavior for  $c = 5.0$ . (c) Inclusion of both a discrete (2 degree-of-freedom) and a continuous (1 d.f.) covariate in the logistic regression modeling has essentially no effect on the behavior of our estimators.
